# Supplementary material
Source: publisher site journal article supplement (https://www.dovepress.com/article/545323)

**Supplementary Material**

Supplementary Table 1**.** Association between Z-Drug use and risk of burn injury as a negative control outcome.

| **Subgroups** | **Before propensity score matching** | | **After propensity score matching** | |
| --- | --- | --- | --- | --- |
|  | **Crude HR**  **(95% CI)** | **Adjusted HR**  **(95% CI)** | **Crude HR**  **(95% CI)** | **Adjusted HR**  **(95% CI)** |
| Negative control outcomes (burn injury) | 1.350  (0.504-3.615) | 1.352  (0.504-3.626) | 1.674  (0.605-4.631) | 0.677  (0.202-2.274) |

**Notes:** Adjustment for sex, age, chronic otitis media, hypertension, diabetes mellitus, hyperlipidemia, depression, anxiety, sleep disorders, head injury

Supplementary Figure 1. Covariate balance before and after matching (Love plot).


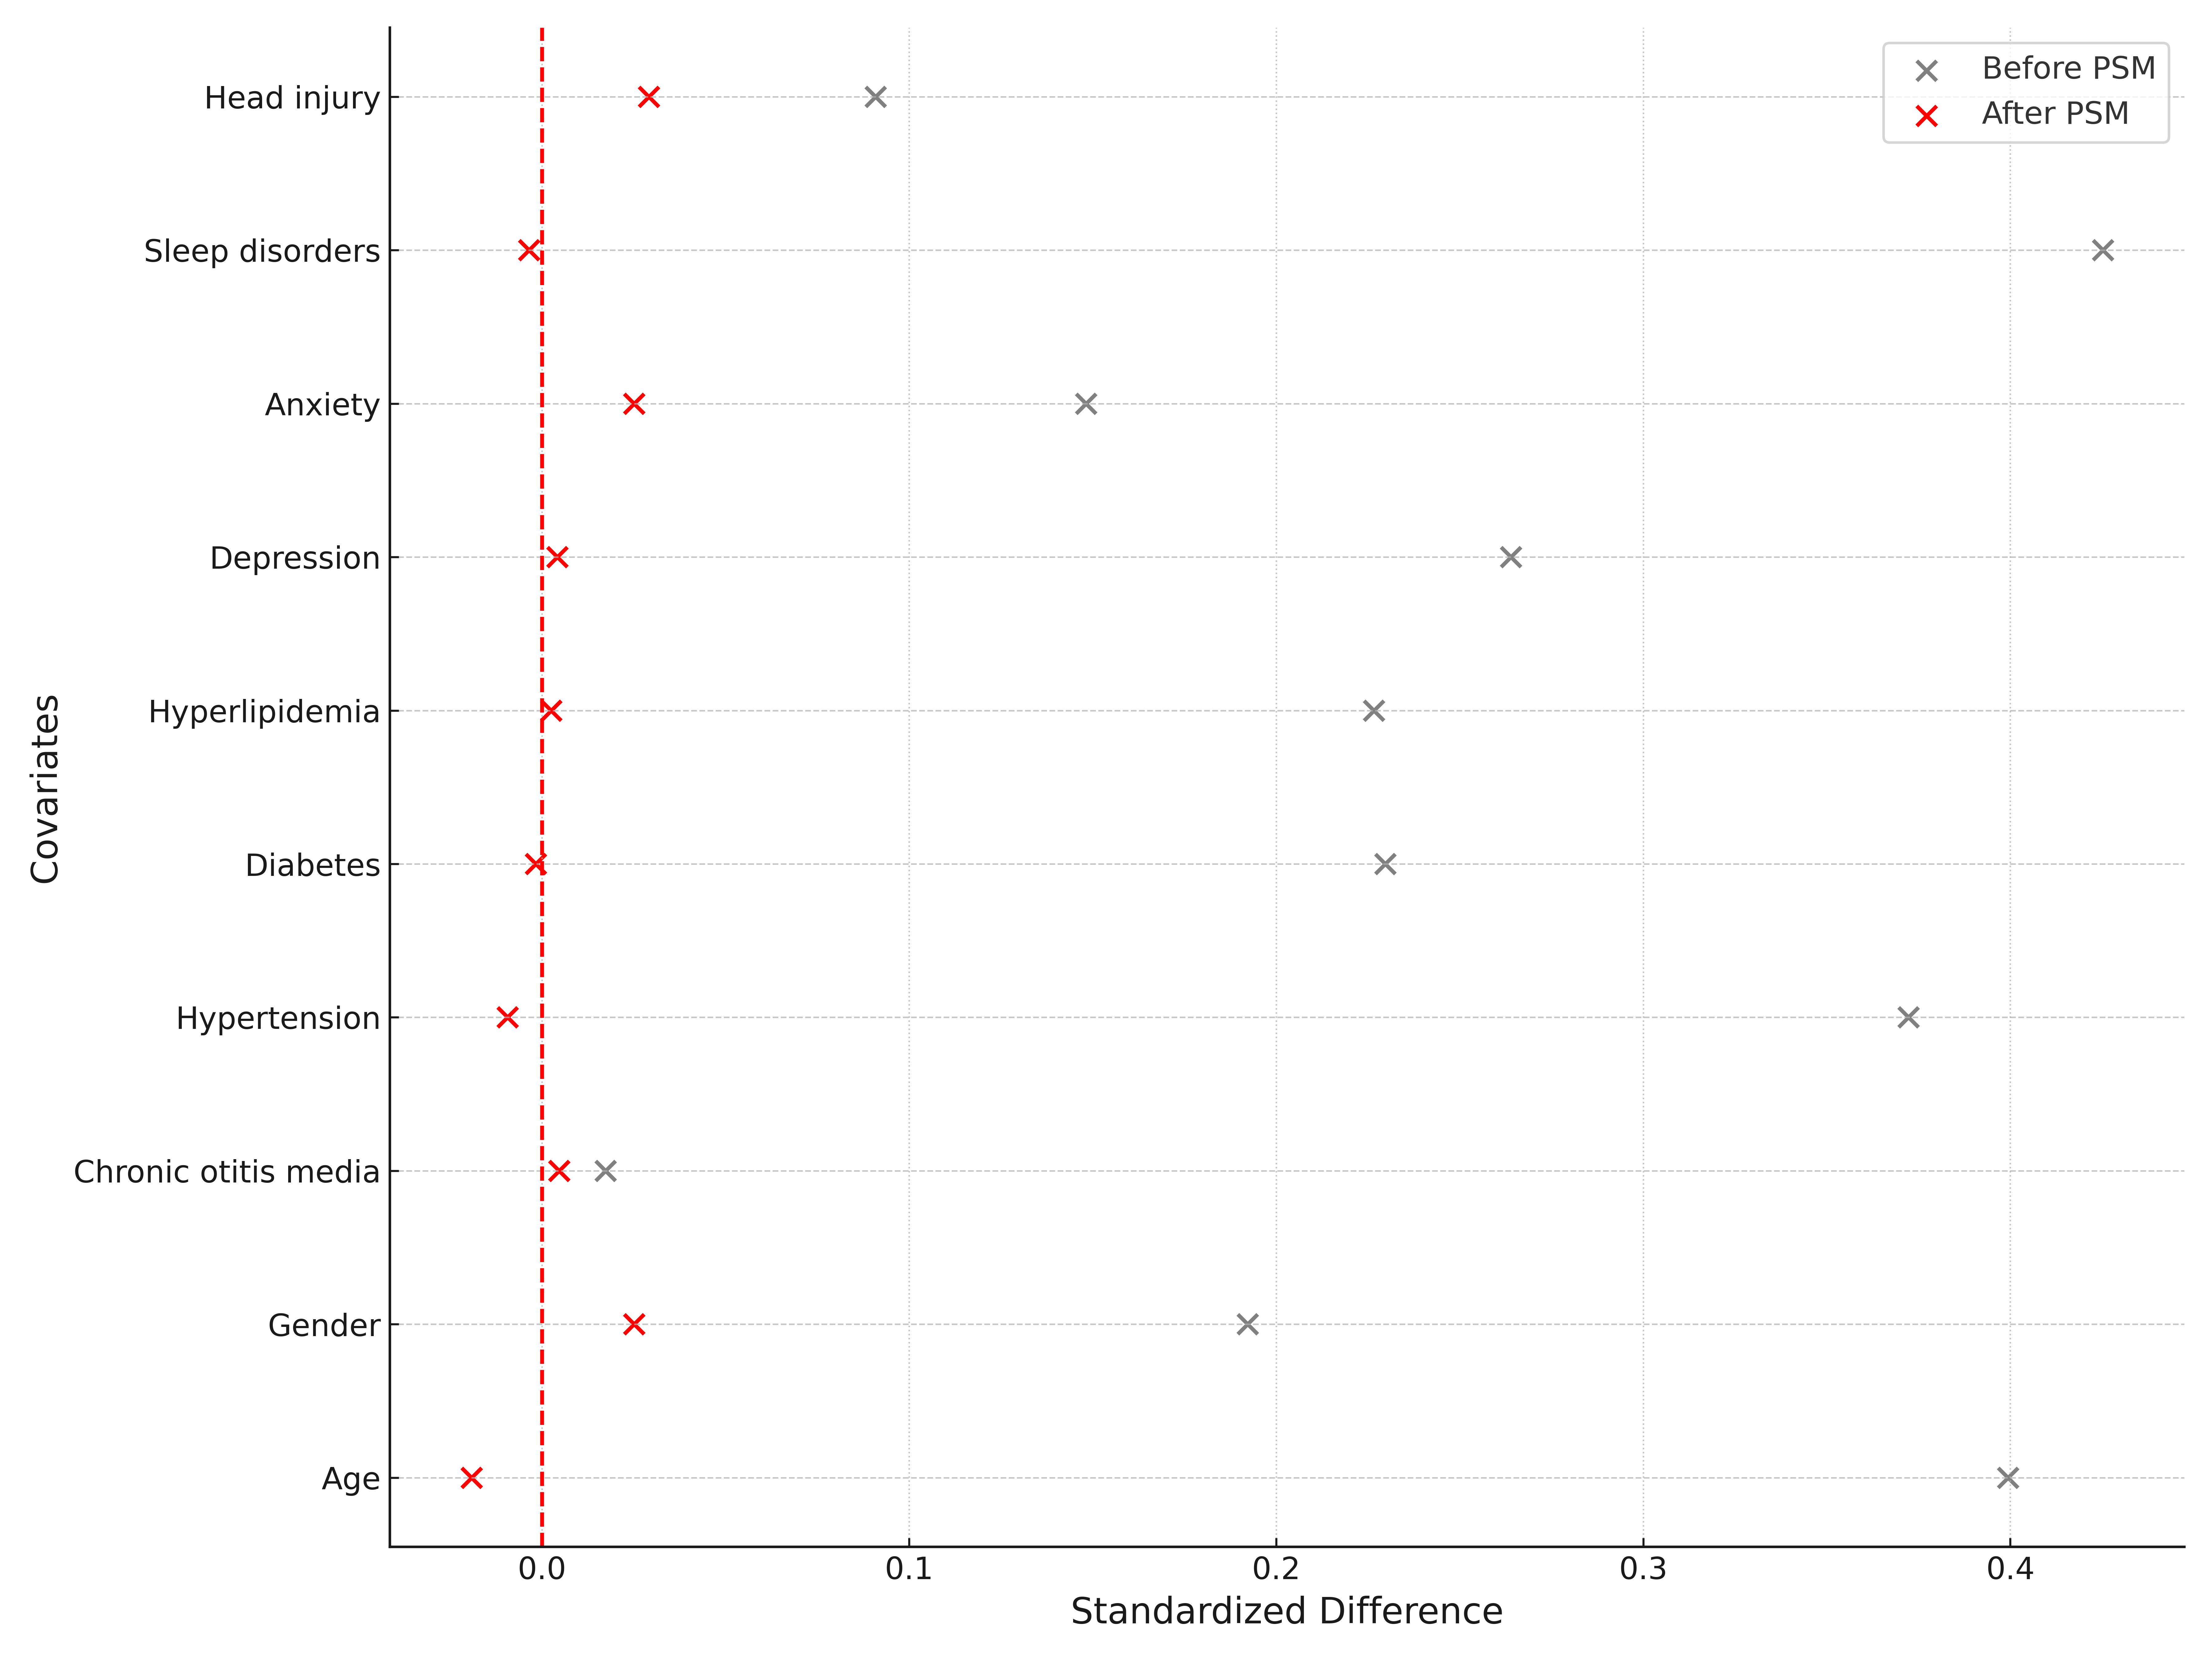

Supplement: Supplementary file 1 [file 545323%20Revised%20Supplementary%20Material.docx]
